# Supplementary material for: TRIM28 Is a Novel Regulator of CD133 Expression Associated with Cancer Stem Cell Phenotype
Source: MDPI journal article supplement (doi:10.3390/ijms23179874), 2022-08-30
Supplement: s1 [file s1]

**TRIM28 is a novel regulator of CD133 expression associated with cancer stem cell phenotype**

*Yan S. Kim<sup>1</sup>, Daria M. Potashnikova<sup>2</sup>, Alisa M. Gisina<sup>1</sup>, Irina V. Kholodenko<sup>1</sup>, Arthur T. Kopylov<sup>3</sup>, Olga V. Tikhonova<sup>3</sup>, Leonid K. Kurbatov<sup>4</sup>, Aleena A. Saidova<sup>2,5</sup>, Anna V. Tvorogova<sup>6</sup>, Roman V. Kholodenko<sup>7</sup>, Pavel V. Belousov<sup>8,9</sup>, Ivan A. Vorobjev<sup>6,10,11</sup>, Victor G. Zgoda<sup>3</sup>, Konstantin N. Yarygin<sup>1</sup>, Alexey Yu. Lupatov<sup>1</sup>.*

<sup>1</sup> Laboratory of Cell Biology, Orekhovich Institute of Biomedical Chemistry, Moscow, Russia.

<sup>2</sup> Cell biology and histology department, School of Biology, Lomonosov Moscow State University, Moscow, Russia

<sup>3</sup> Laboratory of Systems Biology, Orekhovich Institute of Biomedical Chemistry, Moscow, Russia.

<sup>4</sup> Transcriptome Analysis Group, Analytical Branch Department, Orekhovich Institute of Biomedical Chemistry, Moscow, Russia.

<sup>5</sup> Department of transcription factors, Engelhardt Institute of Molecular Biology of the Russian Academy of Sciences, Moscow, Russia.

<sup>6</sup> Laboratory of Cell Motility, Belozersky Research Institute of Physico-Chemical Biology, Lomonosov Moscow State University, Moscow, Russia.

<sup>7</sup> Laboratory of Molecular Immunology, Shemyakin - Ovchinnikov Institute of Bioorganic Chemistry of the Russian Academy of Sciences, Moscow, Russia.

<sup>8</sup> Endocrinology Research Centre, Moscow, Russia.

<sup>9</sup> Center for Precision Genome Editing and Genetic Technologies for Biomedicine, Engelhardt Institute of Molecular Biology of the Russian Academy of Sciences, Moscow, Russia

<sup>10</sup> Department of Biology, School of Sciences and Humanities, Nazarbayev University, Nur-Sultan, Kazakhstan.

<sup>11</sup> Laboratory of Biophotonics and Imaging, National Laboratory Astana, Nazarbayev University, Nur-Sultan, Kazakhstan.

**Supplementary Table S1.** Differentially expressed transcripts and proteins for CD133<sup>+/high</sup> and CD133<sup>-/low</sup> cell populations of Caco2, HT-29 and HUH7 cell lines. «Fold change» represents ratio of transcript or protein expression in CD133<sup>+/high</sup> to CD133<sup>-/low</sup> cells calculated from three biological repeats.

## TRANSCRIPTS

### HT-29

| <i>Gene name</i> | <i>Fold change</i> | <i>Gene name</i>        | <i>Fold change</i> |
|------------------|--------------------|-------------------------|--------------------|
| <i>HLA-DMB</i>   | 4.21               | <i>CRYM</i>             | 2.12               |
| <i>CD133</i>     | 2.97               | <i>SLC4A4</i>           | 2.06               |
| <i>GPC4</i>      | 2.95               | <i>TOX2</i>             | 0.49               |
| <i>RGS2</i>      | 2.25               | <i>MAGEA2, MAGEA2B*</i> | 0.46               |
| <i>SNX10</i>     | 2.17               | <i>SCEL</i>             | 0.45               |

### Caco2

| <i>Gene name</i> | <i>Fold change</i> | <i>Gene name</i>          | <i>Fold change</i> |
|------------------|--------------------|---------------------------|--------------------|
| <i>AHSG</i>      | 3.03               | <i>AXIN2</i>              | 0.46               |
| <i>ALB</i>       | 2.96               | <i>GABARAPL1</i>          | 0.46               |
| <i>RBP4</i>      | 2.70               | <i>TACSTD2</i>            | 0.45               |
| <i>CYP4X1</i>    | 2.62               | <i>COL4A6</i>             | 0.45               |
| <i>CD133</i>     | 2.57               | <i>RGCC</i>               | 0.45               |
| <i>TFF3</i>      | 2.32               | <i>CEP55</i>              | 0.45               |
| <i>SCGN</i>      | 2.31               | <i>S100A14</i>            | 0.45               |
| <i>FRAS1</i>     | 2.24               | <i>PODXL</i>              | 0.44               |
| <i>TTR</i>       | 2.17               | <i>PRSS23</i>             | 0.44               |
| <i>BFSP1</i>     | 2.12               | <i>TAGLN</i>              | 0.44               |
| <i>TFF2</i>      | 2.10               | <i>LTB</i>                | 0.44               |
| <i>AFP</i>       | 2.08               | <i>FGF18</i>              | 0.43               |
| <i>SUSD3</i>     | 2.04               | <i>AC104698.1, LBH*</i>   | 0.43               |
| <i>CHRD2</i>     | 2.01               | <i>AL391319.1, SMOC2*</i> | 0.42               |
| <i>DEPP1</i>     | 0.50               | <i>FAM171B</i>            | 0.42               |
| <i>TPM1</i>      | 0.50               | <i>MYBPH</i>              | 0.42               |
| <i>COG3</i>      | 0.50               | <i>BASPI</i>              | 0.42               |
| <i>EDN3</i>      | 0.50               | <i>COTL1</i>              | 0.41               |
| <i>CCND2</i>     | 0.50               | <i>TFCP2L1</i>            | 0.40               |
| <i>PPIC</i>      | 0.49               | <i>CDC42EP3</i>           | 0.39               |
| <i>UTS2</i>      | 0.49               | <i>TUBB3, TUBB3PI*</i>    | 0.38               |
| <i>ABAT</i>      | 0.49               | <i>MBNL3</i>              | 0.37               |
| <i>CAB39L</i>    | 0.49               | <i>NRP1</i>               | 0.36               |
| <i>C12orf75</i>  | 0.49               | <i>KCNJ16</i>             | 0.35               |
| <i>IGFL2</i>     | 0.49               | <i>ADAM8</i>              | 0.34               |
| <i>S100A6</i>    | 0.48               | <i>NPPB</i>               | 0.34               |
| <i>TNNC1</i>     | 0.48               | <i>BIK</i>                | 0.33               |
| <i>PTGS2</i>     | 0.48               | <i>CAMK1D</i>             | 0.30               |
| <i>NFE2</i>      | 0.48               | <i>OLR1</i>               | 0.30               |
| <i>PROCR</i>     | 0.48               | <i>MYL7</i>               | 0.27               |
| <i>TUBB2B</i>    | 0.48               | <i>SOCS2</i>              | 0.26               |
| <i>RHOA</i>      | 0.47               | <i>ACTG2</i>              | 0.26               |

|                 |      |              |      |
|-----------------|------|--------------|------|
| <i>DPYSL3</i>   | 0.47 | <i>BAMBI</i> | 0.24 |
| <i>MYLPF</i>    | 0.47 | <i>ANXA1</i> | 0.20 |
| <i>TMSB4XP4</i> | 0.46 | <i>WNT6</i>  | 0.18 |
| <i>GPC1</i>     | 0.46 |              |      |

#### HUH7

| <i>Gene name</i>           | <i>Fold change</i> | <i>Gene name</i>         | <i>Fold change</i> |
|----------------------------|--------------------|--------------------------|--------------------|
| <i>CDI33</i>               | 5.58               | <i>UNC5B</i>             | 2.26               |
| <i>BEX1</i>                | 5.52               | <i>PRSS23</i>            | 2.26               |
| <i>DMKN</i>                | 4.82               | <i>FERMT1</i>            | 2.21               |
| <i>BEX2</i>                | 4.72               | <i>TGFB2</i>             | 2.20               |
| <i>COL2A1</i>              | 4.64               | <i>DNAL1</i>             | 2.20               |
| <i>EPCAM</i>               | 4.32               | <i>TRPM6</i>             | 2.18               |
| <i>CRLF1</i>               | 4.02               | <i>CXCL1</i>             | 2.16               |
| <i>COTL1</i>               | 3.98               | <i>NEO1</i>              | 2.14               |
| <i>ERP27</i>               | 3.66               | <i>C3orf38</i>           | 2.11               |
| <i>PLBD1</i>               | 3.25               | <i>ICAM2</i>             | 2.11               |
| <i>NDRG4</i>               | 3.24               | <i>FOXO1</i>             | 2.08               |
| <i>TPD52L1</i>             | 3.15               | <i>LHX2</i>              | 2.08               |
| <i>GCA</i>                 | 3.13               | <i>INCENP</i>            | 2.06               |
| <i>PRKCZ</i>               | 3.12               | <i>SULT1A2</i>           | 2.06               |
| <i>AC093917.1, GBA3*</i>   | 3.09               | <i>HTRA3</i>             | 2.05               |
| <i>FSTL1</i>               | 3.05               | <i>CPE</i>               | 2.04               |
| <i>SLC1A3</i>              | 3.03               | <i>OGT</i>               | 2.03               |
| <i>TESC</i>                | 3.00               | <i>SLC7A7</i>            | 2.02               |
| <i>FST</i>                 | 2.96               | <i>GPX8</i>              | 2.02               |
| <i>DKK1</i>                | 2.89               | <i>KITLG</i>             | 2.02               |
| <i>AUTS2</i>               | 2.82               | <i>SLC6A10P, SLC6A8*</i> | 0.49               |
| <i>AC124309.1, MAGEL2*</i> | 2.78               | <i>MBL2</i>              | 0.48               |
| <i>KRT15, KRT19*</i>       | 2.76               | <i>C2, CFB*</i>          | 0.47               |
| <i>SLIT2</i>               | 2.74               | <i>RTN4RL2</i>           | 0.47               |
| <i>MEST</i>                | 2.67               | <i>C3</i>                | 0.46               |
| <i>EMC10</i>               | 2.64               | <i>GREM2</i>             | 0.45               |
| <i>DUSP26</i>              | 2.55               | <i>FGL1</i>              | 0.40               |
| <i>MAGEA8</i>              | 2.49               | <i>NPTX2</i>             | 0.40               |
| <i>DPYSL5</i>              | 2.38               | <i>CFH, CFHR1*</i>       | 0.38               |
| <i>ENPP4</i>               | 2.38               | <i>CSTA</i>              | 0.33               |
| <i>INPP5D</i>              | 2.34               | <i>NEURL3</i>            | 0.32               |
| <i>EDN1</i>                | 2.34               | <i>ARG1</i>              | 0.26               |
| <i>CAND2</i>               | 2.33               | <i>SERPINC1</i>          | 0.23               |

#### PROTEINS

#### HT-29

| <i>Gene name</i> | <i>Fold change</i> | <i>Gene name</i> | <i>Fold change</i> |
|------------------|--------------------|------------------|--------------------|
| <i>SEPT2</i>     | 4.17               | <i>PDAP1</i>     | 2.16               |
| <i>PSMD2</i>     | 3.60               | <i>TBCA</i>      | 2.10               |
| <i>ARPC5</i>     | 3.50               | <i>THRAP3</i>    | 2.06               |
| <i>EIF5A</i>     | 2.89               | <i>RPS17</i>     | 2.03               |

|                |      |                |      |
|----------------|------|----------------|------|
| <i>ALDH1A1</i> | 2.88 | <i>HIBADH</i>  | 2.03 |
| <i>RPL31</i>   | 2.84 | <i>MTAP</i>    | 2.02 |
| <i>BAG2</i>    | 2.77 | <i>UBQLN1</i>  | 0.49 |
| <i>NDUFS3</i>  | 2.51 | <i>SORD</i>    | 0.49 |
| <i>RBBP7</i>   | 2.45 | <i>TMSB10</i>  | 0.48 |
| <i>ANP32E</i>  | 2.33 | <i>TMED9</i>   | 0.48 |
| <i>RBBP4</i>   | 2.32 | <i>SLC7A5</i>  | 0.47 |
| <i>DDAH1</i>   | 2.31 | <i>HNRNPAB</i> | 0.46 |
| <i>PSMA4</i>   | 2.29 | <i>PODXL</i>   | 0.46 |
| <i>CAPRN1</i>  | 2.26 | <i>IDH3A</i>   | 0.44 |
| <i>PSMD13</i>  | 2.24 | <i>SPINT2</i>  | 0.43 |
| <i>RUVBL2</i>  | 2.23 | <i>PDCD10</i>  | 0.40 |
| <i>NUDC</i>    | 2.23 | <i>GGCT</i>    | 0.40 |
| <i>TMSB4X</i>  | 2.22 |                |      |

### Caco2

| <i>Gene name</i> | <i>Fold change</i> | <i>Gene name</i> | <i>Fold change</i> |
|------------------|--------------------|------------------|--------------------|
| <i>HMGB2</i>     | 4.25               | <i>RPL26</i>     | 0.47               |
| <i>RPS8</i>      | 3.81               | <i>ALDH2</i>     | 0.47               |
| <i>EIF4A3</i>    | 3.53               | <i>CNN2</i>      | 0.46               |
| <i>CLNS1A</i>    | 2.73               | <i>EIF3B</i>     | 0.46               |
| <i>SPEN</i>      | 2.59               | <i>LAP3</i>      | 0.46               |
| <i>RPS19</i>     | 2.55               | <i>SURF4</i>     | 0.45               |
| <i>ETFB</i>      | 2.53               | <i>RPN2</i>      | 0.45               |
| <i>FH</i>        | 2.39               | <i>TCOF1</i>     | 0.45               |
| <i>PPME1</i>     | 2.36               | <i>RAB7A</i>     | 0.44               |
| <i>GLS</i>       | 2.28               | <i>RAB11A</i>    | 0.44               |
| <i>PSME1</i>     | 2.22               | <i>DAD1</i>      | 0.44               |
| <i>RPS25</i>     | 2.20               | <i>AGR2</i>      | 0.42               |
| <i>PARK7</i>     | 2.17               | <i>LMNA</i>      | 0.41               |
| <i>MAP4</i>      | 2.14               | <i>PHB</i>       | 0.40               |
| <i>PRPF19</i>    | 2.10               | <i>ELAVL1</i>    | 0.40               |
| <i>PSMD3</i>     | 2.04               | <i>EIF3G</i>     | 0.38               |
| <i>NUMA1</i>     | 2.02               | <i>VCL</i>       | 0.34               |
| <i>CTTN</i>      | 0.49               | <i>TLN1</i>      | 0.31               |
| <i>EIF4G1</i>    | 0.49               | <i>DBI</i>       | 0.22               |
| <i>TAGLN</i>     | 0.48               |                  |                    |

### HUH7

| <i>Gene name</i> | <i>Fold change</i> | <i>Gene name</i> | <i>Fold change</i> |
|------------------|--------------------|------------------|--------------------|
| <i>LRPPRC</i>    | 10.26              | <i>VIM</i>       | 2.26               |
| <i>AHNAK</i>     | 5.51               | <i>RAB7A</i>     | 2.25               |
| <i>RPS28</i>     | 4.52               | <i>TFG</i>       | 2.24               |
| <i>DDOST</i>     | 4.19               | <i>PSMC1</i>     | 2.23               |
| <i>IDH1</i>      | 3.94               | <i>SERPINH1</i>  | 2.21               |
| <i>PRKDC</i>     | 3.78               | <i>TLN1</i>      | 2.19               |
| <i>MYL12A</i>    | 3.68               | <i>SPTBN1</i>    | 2.18               |
| <i>YWHAG</i>     | 3.60               | <i>HSD17B4</i>   | 2.17               |
| <i>PHGDH</i>     | 3.57               | <i>FABP1</i>     | 2.17               |
| <i>HNRNPL</i>    | 3.49               | <i>ECHS1</i>     | 2.13               |

|                 |      |                   |      |
|-----------------|------|-------------------|------|
| <i>TOMM40</i>   | 3.42 | <i>USP5</i>       | 2.12 |
| <i>DBI</i>      | 3.37 | <i>VCL</i>        | 2.11 |
| <i>YWHAE</i>    | 3.20 | <i>PRDX4</i>      | 2.10 |
| <i>RPS3</i>     | 3.15 | <i>HSPA4</i>      | 2.09 |
| <i>TARDBP</i>   | 3.04 | <i>SRP14</i>      | 2.09 |
| <i>CKB</i>      | 3.04 | <i>RPN1</i>       | 2.07 |
| <i>S100A6</i>   | 2.85 | <i>S100P</i>      | 2.07 |
| <i>PRDX6</i>    | 2.80 | <i>EIF3A</i>      | 2.06 |
| <i>RPL17</i>    | 2.77 | <i>YWHAQ</i>      | 2.06 |
| <i>SEC61A1</i>  | 2.75 | <i>PGD</i>        | 2.02 |
| <i>UCHL1</i>    | 2.72 | <i>TMED9</i>      | 2.01 |
| <i>RPL10</i>    | 2.71 | <i>APEX1</i>      | 2.01 |
| <i>ALDH18A1</i> | 2.69 | <i>TXNRD1</i>     | 2.01 |
| <i>GLUD1</i>    | 2.65 | <i>TMPO</i>       | 2.00 |
| <i>FABP5</i>    | 2.65 | <i>AK4</i>        | 0.50 |
| <i>SPTAN1</i>   | 2.54 | <i>ACAT2</i>      | 0.49 |
| <i>EEF1B2</i>   | 2.47 | <i>SSBP1</i>      | 0.48 |
| <i>HNRNPA3</i>  | 2.45 | <i>PCMT1</i>      | 0.48 |
| <i>SHMT2</i>    | 2.45 | <i>RPS19</i>      | 0.44 |
| <i>CCAR2</i>    | 2.44 | <i>STMN1</i>      | 0.42 |
| <i>CALR</i>     | 2.42 | <i>SF3A3</i>      | 0.42 |
| <i>ACTN4</i>    | 2.39 | <i>NME1-NME2*</i> | 0.38 |
| <i>TUFM</i>     | 2.38 | <i>RPL6</i>       | 0.37 |
| <i>GANAB</i>    | 2.33 | <i>HSPE1</i>      | 0.35 |
| <i>DPP3</i>     | 2.31 | <i>RPS17</i>      | 0.35 |
| <i>IMMT</i>     | 2.31 | <i>RPS14</i>      | 0.32 |
| <i>DDX39B</i>   | 2.31 | <i>TOMM22</i>     | 0.25 |
| <i>DNMIL</i>    | 2.26 |                   |      |

\* Transcripts or proteins could not be distinguished due to similarity of their sequences.

**Supplementary Table S2.** Final lists of transcription factors (TFs), master regulators (MRs), and molecular key regulators (KRs) arranged by rank.

| Gene                            | TFs | MRs | Total rank | Gene                                     | TFs | MRs | Total rank |
|---------------------------------|-----|-----|------------|------------------------------------------|-----|-----|------------|
| <b>Molecular key regulators</b> |     |     |            | <b>Transcription factors (continued)</b> |     |     |            |
| <i>TRIM28</i>                   | 5   | 5   | 10         | <i>BACH2</i>                             | 2   | 0   | 2          |
| <i>RELA</i>                     | 5   | 3   | 8          | <i>BCL6</i>                              | 2   | 0   | 2          |
| <i>MYB</i>                      | 4   | 4   | 8          | <i>BRCA1</i>                             | 2   | 0   | 2          |
| <i>CREB1</i>                    | 4   | 2   | 6          | <i>CDX2</i>                              | 2   | 0   | 2          |
| <i>REST</i>                     | 4   | 2   | 6          | <i>ESR1</i>                              | 2   | 0   | 2          |
| <i>TP53</i>                     | 4   | 2   | 6          | <i>FOXA2</i>                             | 2   | 0   | 2          |
| <i>CEBPA</i>                    | 3   | 3   | 6          | <i>FOXC1</i>                             | 2   | 0   | 2          |
| <i>GABPB1</i>                   | 3   | 2   | 5          | <i>HMGA2</i>                             | 2   | 0   | 2          |
| <i>NANOG</i>                    | 2   | 2   | 4          | <i>HNF4A</i>                             | 2   | 0   | 2          |
| <i>E2F1</i>                     | 2   | 2   | 4          | <i>HOXD12</i>                            | 2   | 0   | 2          |
| <i>E2F3</i>                     | 2   | 2   | 4          | <i>IKZF2</i>                             | 2   | 0   | 2          |
| <i>E2F4</i>                     | 2   | 2   | 4          | <i>IRF1</i>                              | 2   | 0   | 2          |
| <i>E2F7</i>                     | 2   | 2   | 4          | <i>LEF1</i>                              | 2   | 0   | 2          |
| <i>EGR1</i>                     | 2   | 2   | 4          | <i>MAF</i>                               | 2   | 0   | 2          |
| <i>HIF1A</i>                    | 2   | 2   | 4          | <i>MAFB</i>                              | 2   | 0   | 2          |
| <i>HMGA1</i>                    | 2   | 2   | 4          | <i>MAFG</i>                              | 2   | 0   | 2          |
| <b>Transcription factors</b>    |     |     |            | <i>MAFK</i>                              | 2   | 0   | 2          |
| <i>GCM2</i>                     | 6   | 0   | 6          | <i>MEF2A</i>                             | 2   | 0   | 2          |
| <i>IKZF1</i>                    | 5   | 0   | 5          | <i>MEIS1</i>                             | 2   | 0   | 2          |
| <i>KLF6</i>                     | 5   | 0   | 5          | <i>NFE2</i>                              | 2   | 0   | 2          |
| <i>BPTF</i>                     | 4   | 0   | 4          | <i>NFE2L1</i>                            | 2   | 0   | 2          |
| <i>CHURC1</i>                   | 4   | 0   | 4          | <i>NFE2L2</i>                            | 2   | 0   | 2          |
| <i>CTCF</i>                     | 4   | 0   | 4          | <i>NFIA</i>                              | 2   | 0   | 2          |
| <i>GLI1</i>                     | 4   | 0   | 4          | <i>NFIC</i>                              | 2   | 0   | 2          |
| <i>GLI2</i>                     | 4   | 0   | 4          | <i>NR5A2</i>                             | 2   | 0   | 2          |
| <i>GLI3</i>                     | 4   | 0   | 4          | <i>NRF1</i>                              | 2   | 0   | 2          |
| <i>GLIS1</i>                    | 4   | 0   | 4          | <i>PATZ1</i>                             | 2   | 0   | 2          |
| <i>GLIS2</i>                    | 4   | 0   | 4          | <i>PDX1</i>                              | 2   | 0   | 2          |
| <i>GLIS3</i>                    | 4   | 0   | 4          | <i>POU2F1</i>                            | 2   | 0   | 2          |
| <i>GTF2IRD1</i>                 | 4   | 0   | 4          | <i>RBPJ</i>                              | 2   | 0   | 2          |
| <i>HLTF</i>                     | 4   | 0   | 4          | <i>RFX1</i>                              | 2   | 0   | 2          |
| <i>KLF4</i>                     | 4   | 0   | 4          | <i>SMAD4</i>                             | 2   | 0   | 2          |
| <i>MAZ</i>                      | 4   | 0   | 4          | <i>SRF</i>                               | 2   | 0   | 2          |
| <i>MZF1</i>                     | 4   | 0   | 4          | <i>TBX5</i>                              | 2   | 0   | 2          |
| <i>PBX1</i>                     | 4   | 0   | 4          | <i>TEAD1</i>                             | 2   | 0   | 2          |
| <i>PBX2</i>                     | 4   | 0   | 4          | <i>TFDP1</i>                             | 2   | 0   | 2          |
| <i>PBX3</i>                     | 4   | 0   | 4          | <i>ZBTB16</i>                            | 2   | 0   | 2          |
| <i>RREB1</i>                    | 4   | 0   | 4          | <i>ZBTB33</i>                            | 2   | 0   | 2          |
| <i>SOX2</i>                     | 4   | 0   | 4          | <b>Master regulators</b>                 |     |     |            |
| <i>SRY</i>                      | 4   | 0   | 4          | <i>ADAM10</i>                            | 0   | 3   | 3          |
| <i>TCF3</i>                     | 4   | 0   | 4          | <i>CAPNS1</i>                            | 0   | 3   | 3          |
| <i>TFAP2A</i>                   | 4   | 0   | 4          | <i>CDK2</i>                              | 0   | 3   | 3          |
| <i>ZIC1</i>                     | 4   | 0   | 4          | <i>MAPK3</i>                             | 0   | 3   | 3          |
| <i>ZIC2</i>                     | 4   | 0   | 4          | <i>PTGES</i>                             | 0   | 3   | 3          |
| <i>ZIC3</i>                     | 4   | 0   | 4          | <i>ADAM17</i>                            | 0   | 2   | 2          |

|               |   |   |   |                 |   |   |   |
|---------------|---|---|---|-----------------|---|---|---|
| <b>ZNF263</b> | 4 | 0 | 4 | <b>CAMK2A</b>   | 0 | 2 | 2 |
| <b>DBP</b>    | 3 | 0 | 3 | <b>CAMK2B</b>   | 0 | 2 | 2 |
| <b>ELF1</b>   | 3 | 0 | 3 | <b>CAMK2D</b>   | 0 | 2 | 2 |
| <b>ELF2</b>   | 3 | 0 | 3 | <b>CAMK2G</b>   | 0 | 2 | 2 |
| <b>ELF4</b>   | 3 | 0 | 3 | <b>CHUK</b>     | 0 | 2 | 2 |
| <b>ELK1</b>   | 3 | 0 | 3 | <b>CSK</b>      | 0 | 2 | 2 |
| <b>ELK3</b>   | 3 | 0 | 3 | <b>DRD1</b>     | 0 | 2 | 2 |
| <b>ELK4</b>   | 3 | 0 | 3 | <b>DVL2</b>     | 0 | 2 | 2 |
| <b>ERG</b>    | 3 | 0 | 3 | <b>EGF</b>      | 0 | 2 | 2 |
| <b>ETS1</b>   | 3 | 0 | 3 | <b>EGFR</b>     | 0 | 2 | 2 |
| <b>ETS2</b>   | 3 | 0 | 3 | <b>ERBB2</b>    | 0 | 2 | 2 |
| <b>ETV4</b>   | 3 | 0 | 3 | <b>FRAT1</b>    | 0 | 2 | 2 |
| <b>ETV6</b>   | 3 | 0 | 3 | <b>GRIN1</b>    | 0 | 2 | 2 |
| <b>ETV7</b>   | 3 | 0 | 3 | <b>GSK3B</b>    | 0 | 2 | 2 |
| <b>FLI1</b>   | 3 | 0 | 3 | <b>IKBKB</b>    | 0 | 2 | 2 |
| <b>GABPA</b>  | 3 | 0 | 3 | <b>IKBKG</b>    | 0 | 2 | 2 |
| <b>GFI1</b>   | 3 | 0 | 3 | <b>ITGA2B</b>   | 0 | 2 | 2 |
| <b>HDX</b>    | 3 | 0 | 3 | <b>ITGB3</b>    | 0 | 2 | 2 |
| <b>HES1</b>   | 3 | 0 | 3 | <b>MAPK1</b>    | 0 | 2 | 2 |
| <b>HOMEZ</b>  | 3 | 0 | 3 | <b>MAPK11</b>   | 0 | 2 | 2 |
| <b>HOXB13</b> | 3 | 0 | 3 | <b>MAPK12</b>   | 0 | 2 | 2 |
| <b>HOXC13</b> | 3 | 0 | 3 | <b>MAPK13</b>   | 0 | 2 | 2 |
| <b>HSF1</b>   | 3 | 0 | 3 | <b>MLST8</b>    | 0 | 2 | 2 |
| <b>NR5A1</b>  | 3 | 0 | 3 | <b>MTOR</b>     | 0 | 2 | 2 |
| <b>POU1F1</b> | 3 | 0 | 3 | <b>NEK7</b>     | 0 | 2 | 2 |
| <b>POU6F1</b> | 3 | 0 | 3 | <b>PASK</b>     | 0 | 2 | 2 |
| <b>SIX1</b>   | 3 | 0 | 3 | <b>PKN2</b>     | 0 | 2 | 2 |
| <b>SP1</b>    | 3 | 0 | 3 | <b>PTEN</b>     | 0 | 2 | 2 |
| <b>SP3</b>    | 3 | 0 | 3 | <b>PTK2</b>     | 0 | 2 | 2 |
| <b>SP4</b>    | 3 | 0 | 3 | <b>PTPN12</b>   | 0 | 2 | 2 |
| <b>SPI1</b>   | 3 | 0 | 3 | <b>RANBP2</b>   | 0 | 2 | 2 |
| <b>SPIB</b>   | 3 | 0 | 3 | <b>RPS6KB1</b>  | 0 | 2 | 2 |
| <b>TFCP2</b>  | 3 | 0 | 3 | <b>RPTOR</b>    | 0 | 2 | 2 |
| <b>AIRE</b>   | 2 | 0 | 2 | <b>SENP1</b>    | 0 | 2 | 2 |
| <b>BACH1</b>  | 2 | 0 | 2 | <b>TNFRSF1A</b> | 0 | 2 | 2 |

**Supplementary Table S3.** Sequences for lentivirus knockdown and CRISPR/CAS9-mediated knockout (*TRIM28* NCBI Reference Sequence: NG\_046945.1). **(A)** Anti-*TRIM28* shRNA sequences for lentivirus knockdown and negative control sequences against firefly luciferase (Luc). Target sequences are highlighted with yellow. **(B)** Anti-*TRIM28* sgRNA sequences for CRISPR/CAS9-mediated knockout and negative control sequences against *tagRFP*. Target sequences are highlighted with yellow.

## A

| Gene          |           | shRNA sequence (5'-3')                                      |  |
|---------------|-----------|-------------------------------------------------------------|--|
| <i>TRIM28</i> | sense     | GATCCGCATGAACCCCTTGTGCTGTTCAAGAGACAGCACAAGGGGTTTCATGCTTTTGG |  |
|               | antisense | AATTCAAAAAGCATGAACCCCTTGTGCTGTCTCTTGAACAGCACAAGGGGTTTCATGCG |  |
| Luc           | sense     | GATCCCGTACGCGGAATACTTCGATTCAAGAGATCGAAGTATTCCGCGTACGTTTTTGG |  |
|               | antisense | AATTCAAAAACGTACGCGGAATACTTCGATCTCTTGAATCGAAGTATTCCGCGTACGG  |  |

## B

| Gene          |           | sgRNA sequence (5'-3')    |  |
|---------------|-----------|---------------------------|--|
| <i>TRIM28</i> | sense     | caccGTTTGCACTCGGCCTGTAG   |  |
| gRNA_1        | antisense | aaacCTACAGGCCGAGTGCAAAC   |  |
| <i>TRIM28</i> | sense     | aaacCTGGCGGCGAAAAGCGCTCC  |  |
| gRNA_2        | antisense | caccGGAGCGCTTTTCGCCGCCAG  |  |
| <i>TRIM28</i> | sense     | caccGACCGGTAAGTACGAAGTGAT |  |
| gRNA_3        | antisense | aaacATCACTTCGTACTTACCGGTC |  |
| <i>tagRFP</i> | sense     | caccGTCACCACATACGAAGACGG  |  |
|               | antisense | aaacCCGTCTTCGTATGTGGTGAC  |  |
